# Supplementary material
Source: publisher figshare collection journal article supplement (https://sage.figshare.com/ndownloader/files/14652065)
Supplement: Supplementary file 1 [file 14652065]

### **Neighborhood threat**

9 items: “I’ve seen things that worried me when I’ve been out at night,” “Problems such as noisy people, graffiti, and burglary are quite common,” “There are adults that I want to avoid,” “The police are often in the area,” “The adults living here don’t seem to care about us, the younger ones,” “I feel unsafe when I’m out in the evenings,” “I’ve been threatened, hit, or chased this semester,” “There are groups of young people who run around and are threatening to others,” and “The neighbors don’t talk to each other when they meet.” (1) *don’t agree* to (3) *agree completely*.

### **Hazards at school**

4 items: “Have you ever been afraid of other students at school during regular breaks?” “Are there groups of students that hang around at school and threaten others?” “Have you ever seen things at school that made you concerned?” and “Have there been problems with noisy students, graffiti, locker break-ins, or similar things at your school?” (1) *no*, to (5) *yes, often*

### **Personal harassments at school**

5 items: “Has anyone written derogatory things about you on, for example, walls, toilets, the blackboard or lockers, or in other places?” “Has anyone commented or made fun of you or the way you look in a derogatory way?”, “Has anyone told you that you need to change in order to be accepted – for example, lose weight, change style, or change the way you are?”, “Has anyone said things about the way you look, like fatso, skinny, scrawny, big nose, freak, elephant ears, fatty, fat pig, or anything like that?”, and “Has anyone criticized you about personal matters, and told you that you are a brain, loser, geek, freak, nerd, immature, retarded, dull, dork, idiot, mongoloid or things like that?” (1) *never*, to (5) *daily*.

### **Sexual harassments at school**

7 items: “Has anyone commented on your looks or your body in a sexual way that you do not like?” and “Has anyone spread rumors of a sexual nature about you?”, “Has anyone called you a whore, slut, bitch, hooker, pussy, cocksucker, cock, fag, said “I will fuck you” or things like that?”, “Has anyone showed you or given you offensive images, pictures, drawings or messages (or text messages)?”, “Has anyone made jokes or made gestures in a way that is sexual, and that you perceive as negative?”, “Has anyone fondled or touched your body in a sexual way that you don’t like?”, and “Has anyone pushed you into a corner or held you and pulled down/off your clothes?” (1) *never*, to (5) *daily*.

### **Victim of bullying at school**

3 items: “Have you been mocked or teased in an unpleasant way, or has anyone said nasty things to you at school or on the way to or from school (this semester)?” “Have you been beaten, kicked, or assaulted in a nasty way by anyone at school or on the way to or from school (this semester)?” and “Sometimes, people can be excluded by someone or some others and not be allowed to hang out with them. Has this ever happened to you (this semester)?” (1) *no, it has not happened*, to (4) *yes, it has happened several times a week*.

### **Influence at home**

6 items “If you have other points of view, then these viewpoints can change decisions made in the family”, “You feel like you have influence and are partaking in things that happen in your family”, “Your parents listen to you when decisions are to be made in the family”, “Your parents let you take part when you are going to decide something in the family”, “Your parents ask you when decisions are to be made in the family”, and “When you are having a

discussion at home, you usually get to finish what you have to say” (1) *don’t agree at all*, to (4) *agree totally*.

### **Influence at school**

6 items: “If students have objections to things, do the teachers take them into account?”, “Is it possible for students to influence which days you will have homework and tests?”, “Are the students allowed to take part in planning and discussing what they will be taught at school?”, “Do you think that the students can influence planning and teaching?”, “Do you think that the teachers and the students respect each other and listen to each other’s opinions?”, and “Do teachers take students’ opinions seriously?” 1) *don’t agree at all*, to (4) *agree totally*.

### **School satisfaction**

5 items: “How do you like school? (1) *not at all*, to (5) *very much*; ”Do you do your best in school? (1) *almost never*, to (5) *most often*; ”Does school feel like a constraint?” (1) *almost never*, to (5) *very often*; ”How would you describe the relationship between yourself and school?” (1) *as enemies*, to (5) *as best friends*; ”Are you satisfied with your school work?” (1) *almost never*, to (5) *most often*.

### **Good teacher relationships**

6 items: ”Do the teachers at school care about the students?” (1) *no, hardly about any of them*, to (3) *yes, about all of them or almost all of them*; ”If you have problems with something at school, can you talk to your teachers about it?” (1) *no, hardly with any of them*, to (3) *yes, with all of them or almost all of them*; ”Are your teachers there for you if you want to talk about things that aren’t school-related?” (1) *no, hardly any of them*, to (3) *yes, all of them or almost all of them*; ”Are the teachers at the school just towards the students?” (1) *no, hardly any of them*, to (3) *yes, all of them or almost all of them*; ”Do the teachers give the students praise when they are doing a good job?” (1) *no, hardly any of them*, to (3) *yes, all of them or almost all of them*; and ”Do the teachers at the school like the students?” (1) *no, hardly any of them*, to (3) *yes, all of them or almost all of them*.

### **Missing or longing for school**

2 items: “On a Sunday, how do you feel about going to school the next day?” (1) *Bad, I want to stay at home and have some more free time* to (3) *Great, I long for school and my friends there* and “During a long school break, how often do you long for school?” (1) *Do not long for school at all* to (3) *During a large part of the school break*.

### **Delinquency**

17 items on delinquent behavior during the last year: “Have you taken things from a store, stand, or shop without paying?”, “Have you, purposely, destroyed or participated in destroying objects such as windows, street lights, phone booths, benches, gardens, etc.?”, “Have you taken money from home that didn’t belong to you?”, “Have you taken part in painting graffiti, or writing with markers or spray-paint on for example a concrete wall?”, “Have you participated in breaking into a home, shop, stand, storage room or other building with the intention of taking things?”, “Have you stolen something from someone’s pocket or bag?”, “Have you bought or sold something that you knew or thought had been stolen?” “Have you taken a bicycle without permission?”, “Have you threatened or forced someone to give you money, cigarettes, or anything else?”, “Have you participated in a street fight in town?”, “Have you carried weapons (e.g., brass knuckles, bat, knife, switchblade, or other weapons) at school or in town?”, “Have you taken a moped, motorcycle, or vespa without permission?”, “Have you participated in beating up someone, believing or knowing that

he/she needed hospital treatment afterwards?”, “Have you intentionally hurt someone with a knife, switchblade, brass knuckles, or some other weapon?”, “Have you taken part in threatening or forcing someone to do something that he or she didn’t want to do?”, “Have you snuck away without paying (e.g., from the movies, a café, the train or bus, or somewhere else)?”, and “Have you taken part in stealing something from a car? (1) *no, it has not happened* it to (5) *more than 10 times*.

### **Personal and sexual harassments of other students**

2 items asked after the questions if the participants had been personally or sexually harassed by others, respectively: “Have you yourself on any occasion this semester said or done any of the things described above towards others?” (1) *no*, to (5) *almost every day*.

### **Bullying other students**

3 items: “Have you said nasty things, mocked or teased anyone in an unpleasant way at school this semester?”, “Have you beaten, kicked, or assaulted anyone in an unpleasant way at school or on the way to or from school this semester?”, and “Have you participated in ostracizing someone this semester?” (1) *no, it has not happened*, to (4) *yes, it has happened several times a week*.
